# Supplementary material
Source: Research Square preprint supplement (doi:10.21203/rs.3.rs-9229684/v1)
Supplement: Supplementary file 1 [file 9294b257f0aa505dbe763914.docx]

**APPENDIX 1**

**STUDY QUESTIONAIRRE**

| **SECTION A: INTERVIEW INFORMATION** |
| --- |
| **Date of interview** (*dd/mm/yyyy*)………………….[__][___]/[___][____]/[___][____][___][____] |
| **Interviewer Name:** |
| **Study code………ASA**[ ][ ] [ ] [ ] |
| **Facility:** |
| **SECTION B:DEMOGRAPHICS** |
| **Q1.Patient ID/Folder number:** |
| **Q2.Patient name:** |
| **Q3.Marital status**(*please circle one*)  Single……………1  Cohabiting…….2  Married………..3  Separated…….4  Divorced……….5  Widowed……...7 |
| **Q4.Religion**(*please circle one*)  Christian………………………………..1  Muslim…………………………………..2  African traditional religion……..3  Atheist……………………………………4  Others(Specify)……………………….5 |
| **Q5.Age(completed age in years at time of interview)**……………………[___][___]YEARS |
| **Q6.Number of completed years of formal education (***Starting from primary school)………….*[___][___][___]YEARS |
| **Q7.Occupation**(*please circle one*)  Housewife………………………….….1  Trader…………………………………….2  Farmer…………………………………...3  Public/civil servant……………….…4  Artisan…………………………………….5  Banker…………………………………….6  Businesswoman…………………………..7  Others(specify)……………………….8  ………………………………………………………………… |
| **Q8.Height**……………..[ ___][____].[___][____]m |
| **Q9.Pre-pregnancy/Booking Weight**…………….[____][____ ][____].[___]kg |
| **Q10 BMI……………….[____][____]Kg/m2** |
| **Q11.Gravidity**………….. [____] |
| **Q12.Parity…**……………… [____] |
| **Q13.Expected date Of delivery (EDD) from USG… [**___][___]/[___][____]/[____][____][___][____] |
| **SECTION B:PAST OBSTETRIC,MEDICAL AND FAMILY HISTORY** |
| **Q14.Which of the following medical disorders have you been diagnosed of?** (*circle all that apply*)  Not applicable…………………………0  Chronic Hypertension……………..1  Diabetes mellitus………………………2  Sickle cell disease………………….3  Asthma………………………………..4  Antiphospholipid syndrome(APS)……………………5  Thyroid dysfunction………………………6  SLE….7  Chronic kidney disease……………………………8  Others( specify)……………9  …………………………………………………. |
| **Q15.Were you diagnosed of pre-eclampsia in a previous pregnancy?(if no skip to question 20)**  Not applicable…..0  **Yes………….1**  No……………2  Don’t know……3 |
| Q16: At what Gestational age were you diagnosed?  [___][____]weeks+[___]days |
| **Q17. At what gestational age did you deliver in your previous pregnancy?**  Not applicable…………………..0  Estimated Gestational Age(EGA) at delivery………….[___][____]weeks+[___]days |
| **Q18.Has any first degree relation ever had pre-eclampsia?** (*please circle one*)  Yes………………..1  No…………………2  don’t know……3 |
| **SECTION C:CURRENT PREGNANCY** |
| **Q19.What was the gestational age at booking………….[___][____]weeks+[___]days** |
| **Q20.what was the blood pressure at booking?**  [____][____ ][____]/[___] [___] mmHg |
| **Q21.what was the urine protein at booking?**  Not checked…..0  Negative…………1  1+……………………2  2+……………………3  3+……………………4  4+……………………5 |
| **Q22. Is patient currently on aspirin prophylaxis? ( if no skip to question 25)**  Yes……….1  No………..2 |
| **Q23. What dose of aspirin is patient on?**  150mg………1  75mg…………2 |
| **Q24. At what gestational age was aspirin started?**  [___][____]weeks+[___]days |
| **Q25.Is patient currently on calcium treatment?(if no, skip to Q28)**  Yes……..1  No………2 |
| **Q26. What dose of calcium is patient on?** |
| **Q27. At what gestational age was calcium started?**  [___][____]weeks+[___]days |
| **Q28. Has patient been diagnosed of any pregnancy related hypertensive disorder in this pregnancy? (if no, skip to question 34.)**  Yes………1  No………..2 |
| **Q29.Which type of pregnancy related hypertensive disorder has patient been diagnosed of?**  Gestational hypertension……….1  Pre-eclampsia……………………..2 |
| **Q30. At what gestational age was the diagnosis made?**  [___][____]weeks+[___]days |
| **Q31. What was the blood pressure at diagnosis of the pregnancy related hypertensive disorder?**  [____][____ ][____]/[___] [___] mmHg |
| **Q32.Is patient on anti-hypertensive medication?**  Yes………1  No……….2 |
| **Q33. What blood pressure medication is patient on?** |
|  |
| **SECTION D;RISK FACTORS FOR PRE-ECLAMPSIA: ISSHP 2021** |
| **Q34;HIGH RISK FACTORS;CIRCLE ALL THAT APPLY**  Previous pre-eclampsia………1  Chronic HPT……………………………2  Chronic renal disease…………..3  Pre gestational diabetes mellitus…..4  APS or SLE……………..5  Body mass index(BMI) >/= 30……6  ART in current pregnancy;……..7 |
| **Q35:MODERATE RISK FACTORS:TICK ALL THAT APPLY**  Prior placental abruption……..1  Prior stillbirth………………………….2  Prior fetal growth restriction….3  Maternal age >40yrs…………………………4  Nulliparity……………5  Multifetal gestation ………6 |
| **Q36.Inter-pregnancy interval**?........................[____][____]months |
| **SECTION E:DETAILS OF FERTILITY TREATMENT** |
| **Q37: What type of embryo transfer did patient undergo?**  A fresh embryo transfer ……..1  B frozen embryo transfer …..2 |
| **39. What type of ART treatment did patient undergo?**  Conventional IVF……..1  ICSI…………….2 |
| **40: What type of gametes were used?**  Self-cycle……………..1  Donor egg cycle/recipient cycle….2  Donor sperm…………3  Embryo adoption…….4  Gestational surrogate….5 |
| **SECTION F:DELIVERY DETAILS** |
| **Q41.What was the mode of delivery??** (*please circle one*)  Vaginal delivery…………………..1  Caesarean section……………………2 |
| **Q42.What was the GESTATIONAL AGE AT DELIVERY/TERMINATION OF PREGNANCY?**  [___][____]weeks+[___]days |
| **Q43.WAS PREGNANCY TERMINATED BEFORE 28WKS?(if no skip to Q 45)**  Yes……..1  No………2 |
| **Q44.IF PREGNANCY WAS TERMINATED BEFORE 28WKS, WHAT WAS THE REASON/INDICATION?**  Spontaneous miscarriage……1  Severe pre-eclampsia………...2  Others(specify)……………….3 |
| **SECTION G;MATERNAL OUTCOMES** |
| **Q45.Which of the following complications occurred in the current pregnancy? (*please circle ALL THAT APPLY*)**  Not applicable……………………..0  Pre-eclampsia……………………1  Gestational hpt………………..2  Eclampsia……………………………3  Cerebrovascular accident…….4  Postpartum haemaorrhage…..5  Organ dysfunction…………………….6  Maternal near miss related to HPT disorder…….7  Admission to ICU………………………………………….8  Others(specify)…………………….9 |
| **Q46.How long did patient stay in the hospital?**  One day……….1  Two days……..2  Three days…..3  Four days……..4  Five days……….5  Six days…………6  Others (specify)...7 |
| **Q47.Did the mother die?(If no, skip to Q49)**  Yes……..1  No………2 |
| **Q48. If mother died, was the cause of death related TO HDP?**  Not applicable……0  Yes…………...1  No…………..2 |
| **SECTION H; EARLY PERINATAL OUTCOMES?** (*please circle all that apply* ) |
| **Q 49.Was baby delivered prematurely?**  **Yes……..1**  **No……….2**  **If No, skip to Q51** |
| **Q50.IF baby was premature, what was the GA at delivery?**  [___][____]weeks+[___]days |
| **Q51.Was there FGR in the pregnancy?**  Yes………1  No………..2 |
| **Q52. If there was FGR, what stage was it?**  Not applicable………..0  Stage 1……………………1  Stage 2………………………2  Stage 3……………………….3 |
| **Q53.What was the APGAR score at 5 minutes?**  5minutes APGAR SCORE…….. |
| **Q54.What was the birthweight of baby**?....................[___].[___][____]kg |
| **Q55.Was baby admitted to NICU?**  Not applicable………0  Yes………..1  No………….2  If No, skip to Q57 |
| **Q56.What was the indication for admission to NICU?**  Not applicable……………………0  Low Apgar scores….…………..1  Large caput………………………..2  Meconium stained liquor…..3  Prematurity……………………….4  Low birthweight………………..5  Prolonged ROM………………….6  Others (specify)……………….…8  ………………………………………………….. |
| **Q57.Was baby stillborne?**  Yes……………………1  No…………………….2 |
| **Q58.Did baby die within 72hrs of birth?**  Not applicable……….0  Yes…………………………..1  No…………………………..2 |
|  |
